# Supplementary material for: Chiral ionic liquids supported on natural sporopollenin microcapsules
Source: Royal Society of Chemistry journal article supplement (doi:10.1039/c8ra03455a), 2018-01-01
Supplement: c8ra03455a1.pdf [file c8ra03455a1.pdf]

## Chiral Ionic Liquids Supported on Natural Sporopollenin Microcapsules

Ivan Palazzo,<sup>a</sup> Andrea Mezzetta,<sup>a</sup> Lorenzo Guazzelli,<sup>a,\*</sup> Stefania Sartini,<sup>a</sup> Christian Silvio Pomelli,<sup>a</sup>  
Wallace O. Parker Jr.,<sup>b</sup> Cinzia Chiappe<sup>a,\*</sup>

a) Dipartimento di Farmacia, Università di Pisa, Via Bonanno 33, 56126, Pisa, Italy

b) Eni, Research & Technical Innovation, Physical Chemistry Department, Via Maritano 26, 20097, San Donato  
Milanese, Italy

### *Supporting Information*

#### *Table of contents*

<sup>13</sup>C-MAS NMR spectra page S1

Energy-Dispersive X-ray spectra (EDX) page S2

Thermal gravimetric analysis (TGA) of materials page S4-S7

IR Spectra and imaging data of materials page S8-S10

SEM images of materials page S11-S14

## $^{13}\text{C}$ -MAS NMR spectra

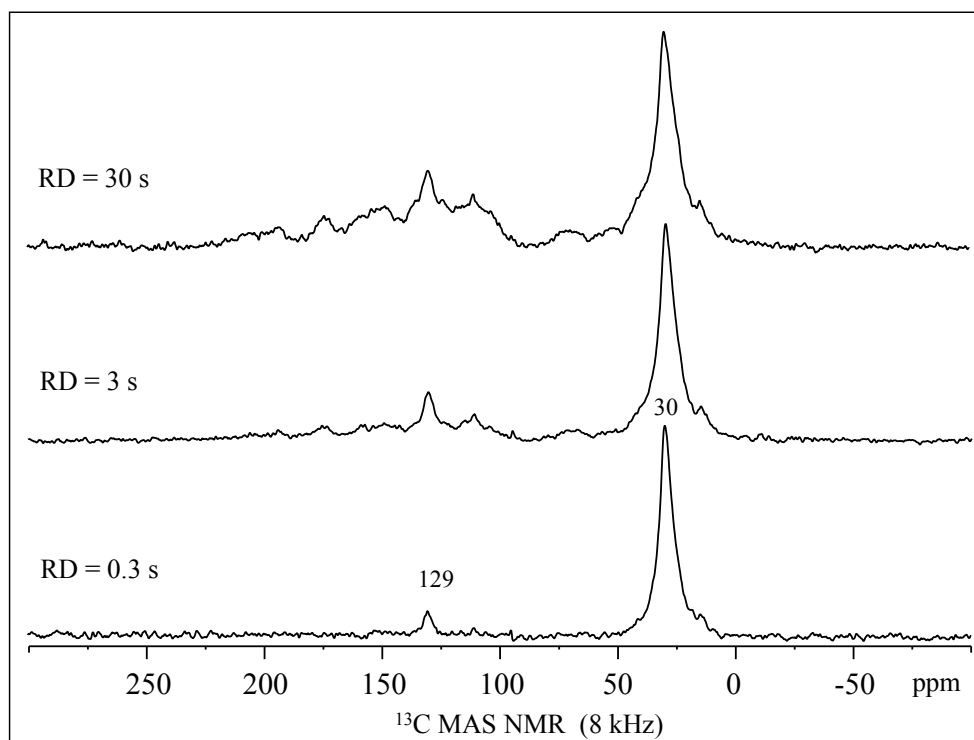

**Figure S1.**  $^{13}\text{C}$  MAS NMR spectra of sporopollenin capsules (SEC) collected with varying relaxation delay (RD) times. The top spectrum was an average of 10.7 k scans (3.7 days). The other spectra are an average of 20 k scans.

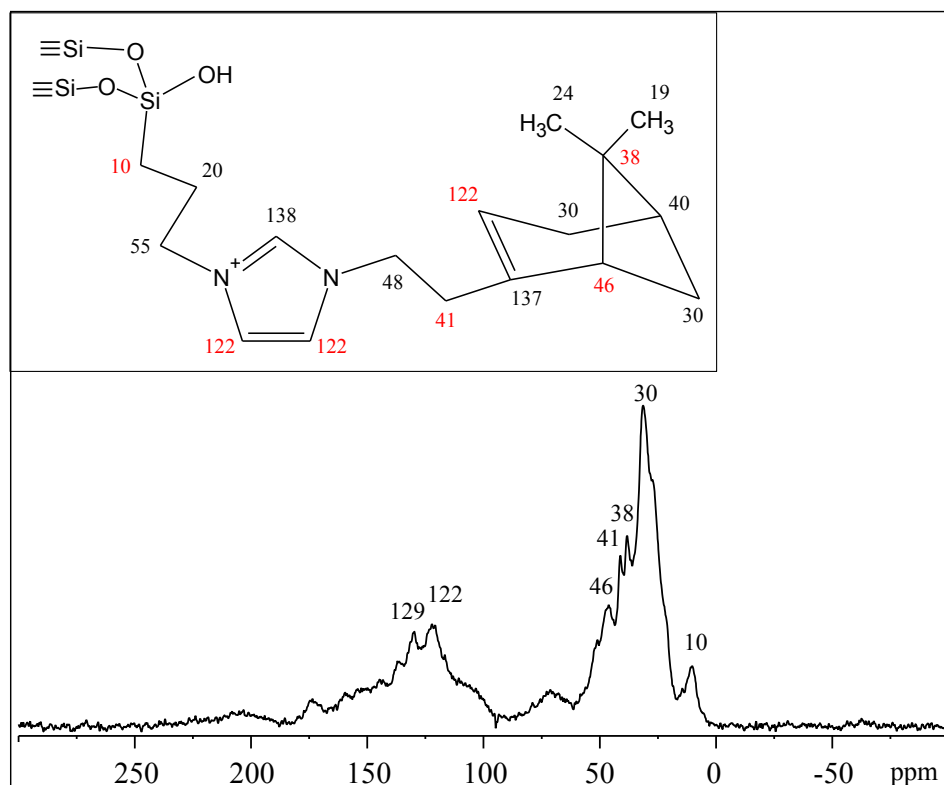

**Figure S2.**  $^{13}\text{C}$  CP-MAS NMR spectrum of IL-functionalized sporopollenin **5a** with assignment of selected peaks according to chemical shifts estimated [1] for the functionalized ionic-liquid group.

1)  $^{13}\text{C}$  shifts estimated using ACD/ChemSketch version 2015.2.5

### Energy-Dispersive X-ray spectra (EDX)

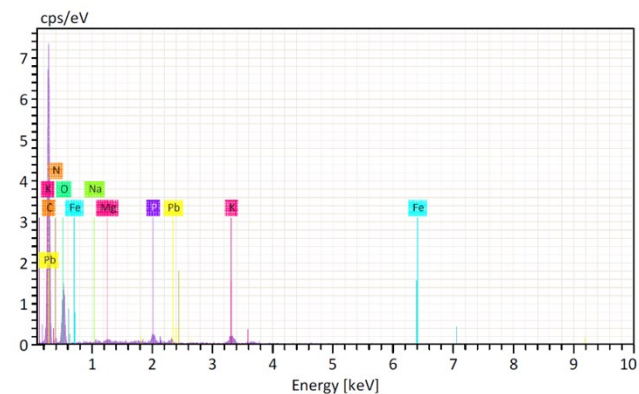

a)

| Element    | At. No. | Netto         | Mass [%]      | Atom [%]      | abs. error [%] (1 sigma) |
|------------|---------|---------------|---------------|---------------|--------------------------|
| Carbon     | 6       | 6304          | 55.30         | 63.19         | 8.34                     |
| Nitrogen   | 7       | 125           | 5.77          | 5.66          | 2.67                     |
| Oxygen     | 8       | 2064          | 34.74         | 29.80         | 6.56                     |
| Sodium     | 11      | 2             | 0.01          | 0.01          | 0.01                     |
| Magnesium  | 12      | 71            | 0.20          | 0.11          | 0.06                     |
| Phosphorus | 15      | 415           | 0.94          | 0.42          | 0.09                     |
| Potassium  | 19      | 509           | 2.14          | 0.75          | 0.15                     |
| Iron       | 26      | 0             | 0.00          | 0.00          | 0.00                     |
| Lead       | 82      | 140           | 0.89          | 0.06          | 0.12                     |
| <b>Sum</b> |         | <b>100.00</b> | <b>100.00</b> | <b>100.00</b> |                          |

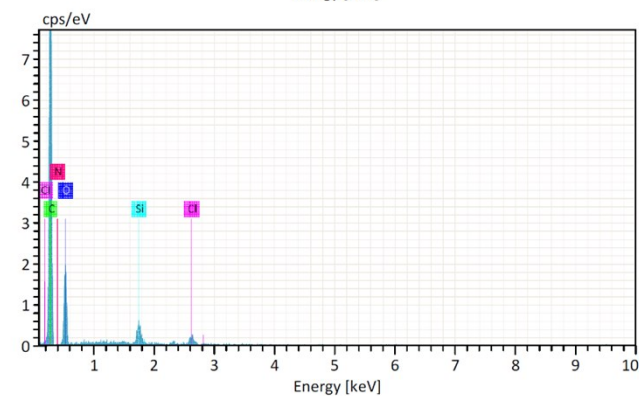

b)

| Element    | At. No. | Netto         | Mass [%]      | Atom [%]      | abs. error [%] (1 sigma) |
|------------|---------|---------------|---------------|---------------|--------------------------|
| Carbon     | 6       | 14073         | 69.45         | 75.78         | 9.31                     |
| Nitrogen   | 7       | 33            | 1.02          | 0.95          | 0.83                     |
| Oxygen     | 8       | 2725          | 27.12         | 22.22         | 4.82                     |
| Silicon    | 14      | 1071          | 1.62          | 0.76          | 0.12                     |
| Chlorine   | 17      | 536           | 0.79          | 0.29          | 0.07                     |
| <b>Sum</b> |         | <b>100.00</b> | <b>100.00</b> | <b>100.00</b> |                          |

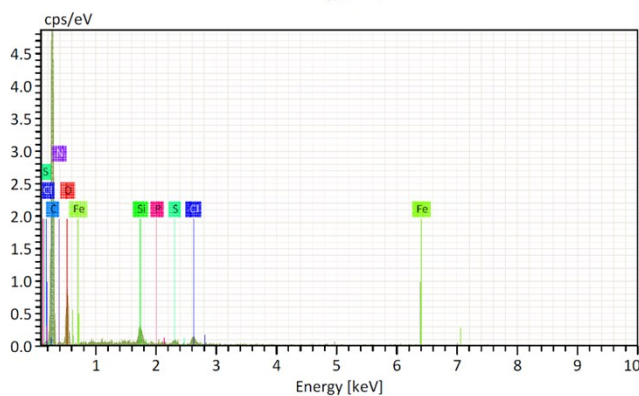

c)

| Element    | At. No. | Netto         | Mass [%]      | Atom [%]      | abs. error [%] (1 sigma) |
|------------|---------|---------------|---------------|---------------|--------------------------|
| Carbon     | 6       | 7932          | 71.43         | 77.43         | 10.38                    |
| Nitrogen   | 7       | 45            | 2.61          | 2.43          | 1.85                     |
| Oxygen     | 8       | 1206          | 23.40         | 19.04         | 5.06                     |
| Silicon    | 14      | 554           | 1.50          | 0.70          | 0.13                     |
| Phosphorus | 15      | 0             | 0.00          | 0.00          | 0.00                     |
| Sulfur     | 16      | 121           | 0.28          | 0.12          | 0.06                     |
| Chlorine   | 17      | 255           | 0.77          | 0.28          | 0.09                     |
| Iron       | 26      | 0             | 0.00          | 0.00          | 0.00                     |
| <b>Sum</b> |         | <b>100.00</b> | <b>100.00</b> | <b>100.00</b> |                          |

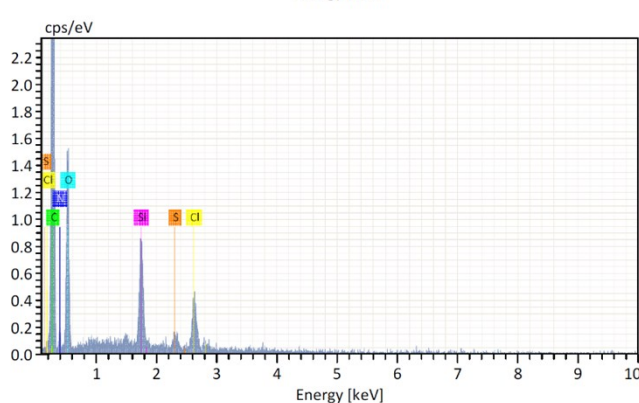

d)

| Element    | At. No. | Netto         | Mass [%]      | Atom [%]      | abs. error [%] (1 sigma) |
|------------|---------|---------------|---------------|---------------|--------------------------|
| Carbon     | 6       | 10159         | 65.29         | 72.42         | 9.15                     |
| Nitrogen   | 7       | 165           | 5.38          | 5.12          | 2.24                     |
| Oxygen     | 8       | 2132          | 24.34         | 20.27         | 4.57                     |
| Silicon    | 14      | 1795          | 3.18          | 1.51          | 0.19                     |
| Sulfur     | 16      | 217           | 0.27          | 0.11          | 0.05                     |
| Chlorine   | 17      | 1021          | 1.53          | 0.57          | 0.10                     |
| <b>Sum</b> |         | <b>100.00</b> | <b>100.00</b> | <b>100.00</b> |                          |

**Figure S3:** Energy-Dispersive X-ray spectra of a) pristine *Populus deltoides* pollen, b) 3-chloropropyl-functionalized sporopollenin CPS-SSP, c) IL-functionalized sporopollenin **5a**, d) IL-functionalized sporopollenin **5b**.

## Thermal gravimetric analysis (TGA)

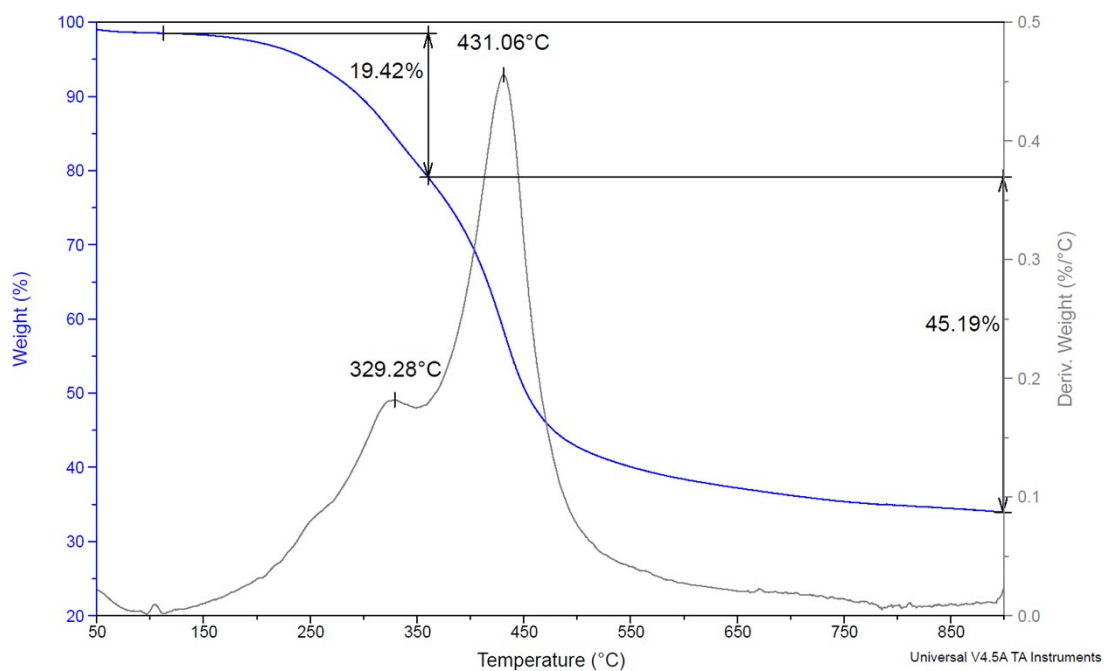

**Figure S4** Thermal gravimetric analysis of sporopollenin.

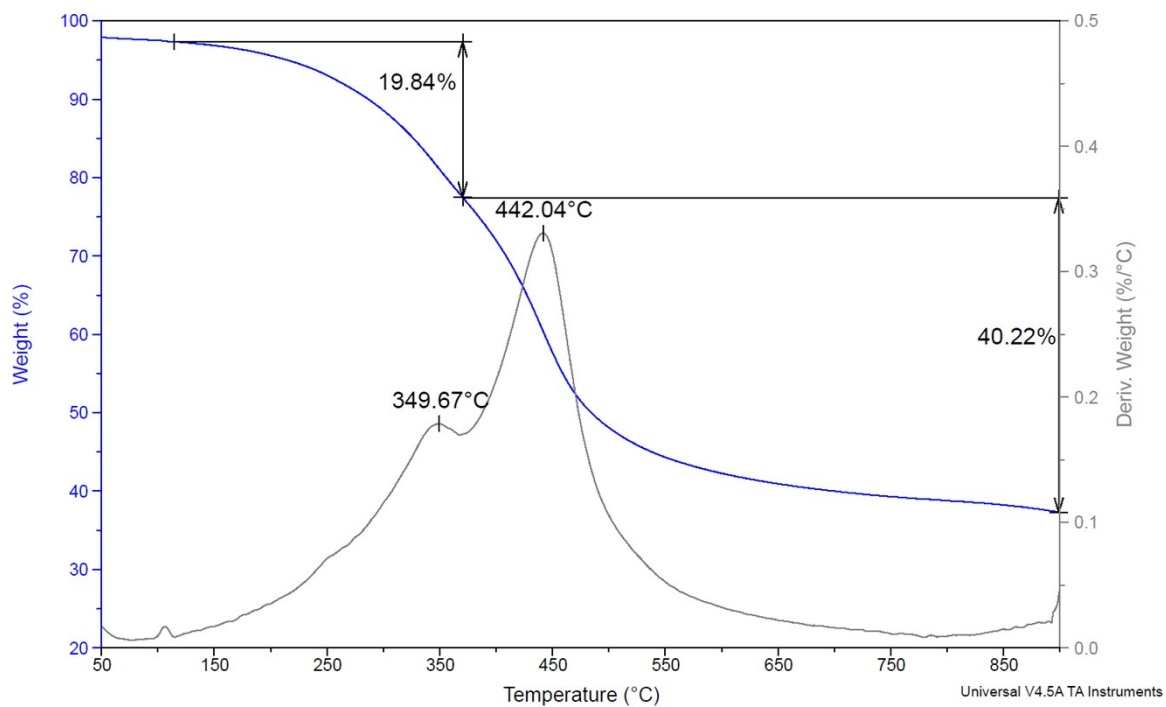

**Figure S5** Thermal gravimetric analysis of 3-chloropropyl-functionalized sporopollenin CPS-SSP.

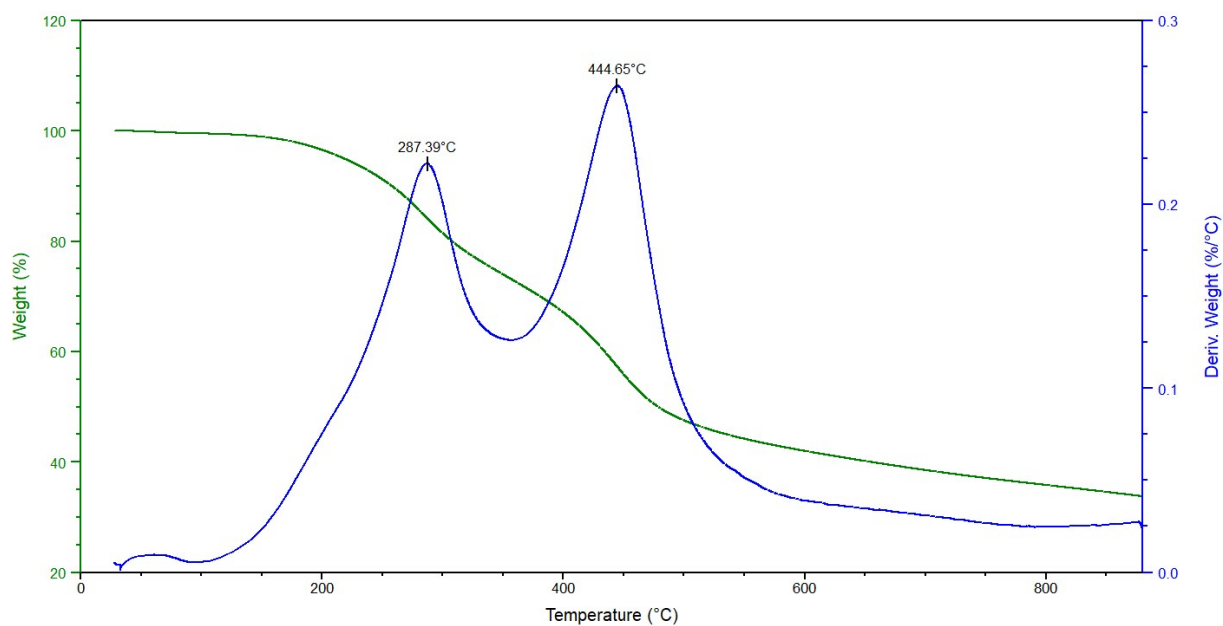

**Figure S6** Thermal gravimetric analysis of IL-functionalized sporopollenin **5a**.

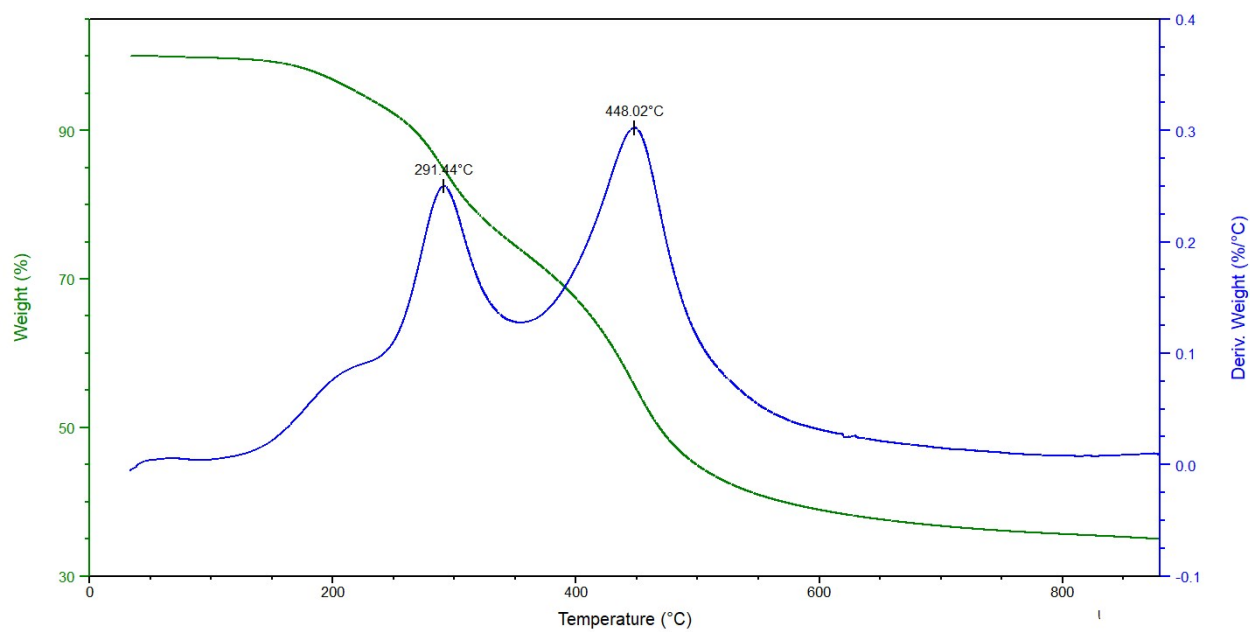

**Figure S7** Thermal gravimetric analysis of IL-functionalized sporopollenin **5b**.

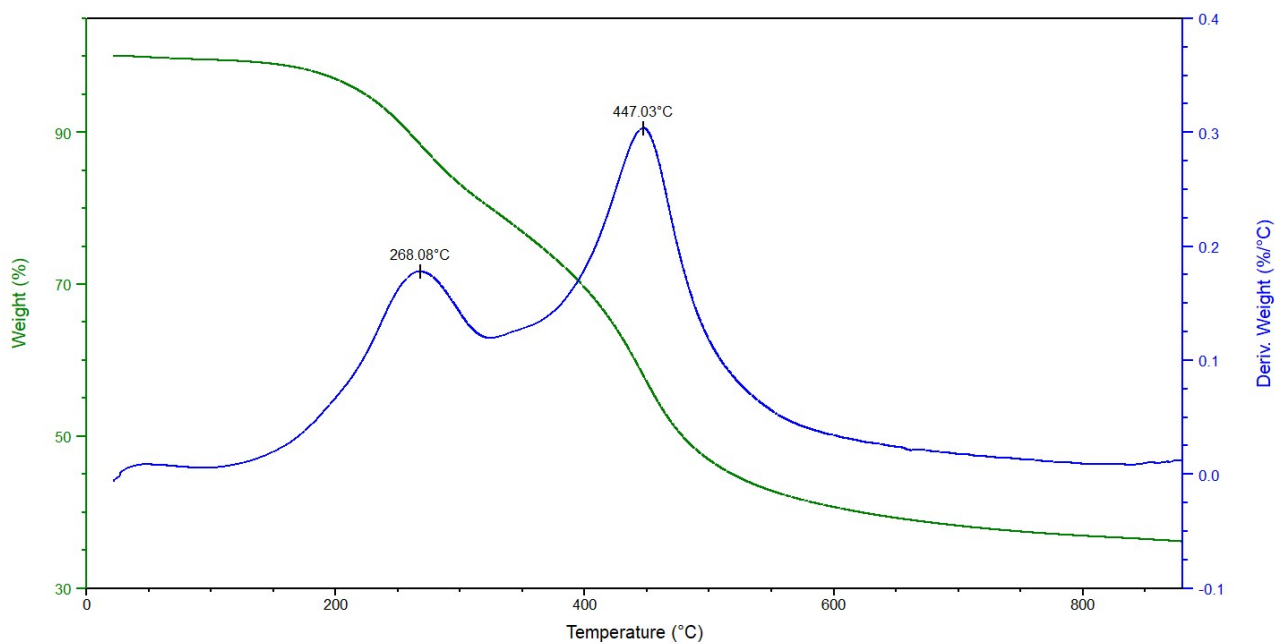

**Figure S8** Thermal gravimetric analysis of IL-functionalized sporopollenin **5c**.

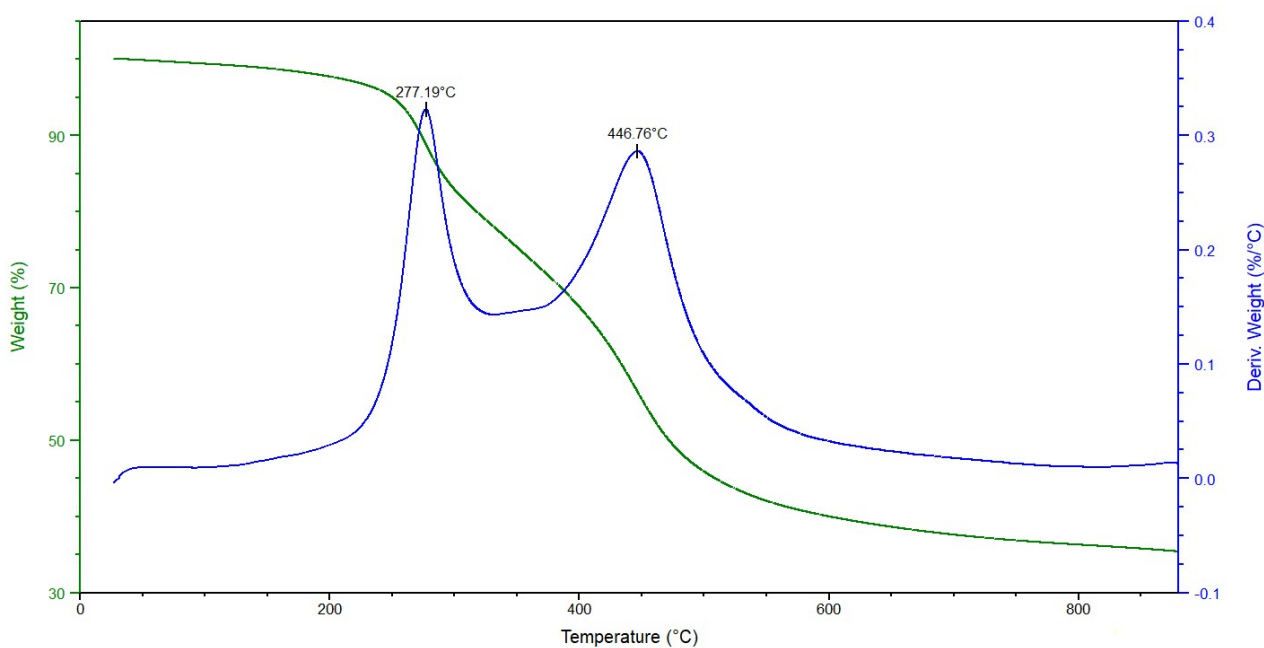

**Figure S9** Thermal gravimetric analysis of IL-functionalized sporopollenin **5d**.

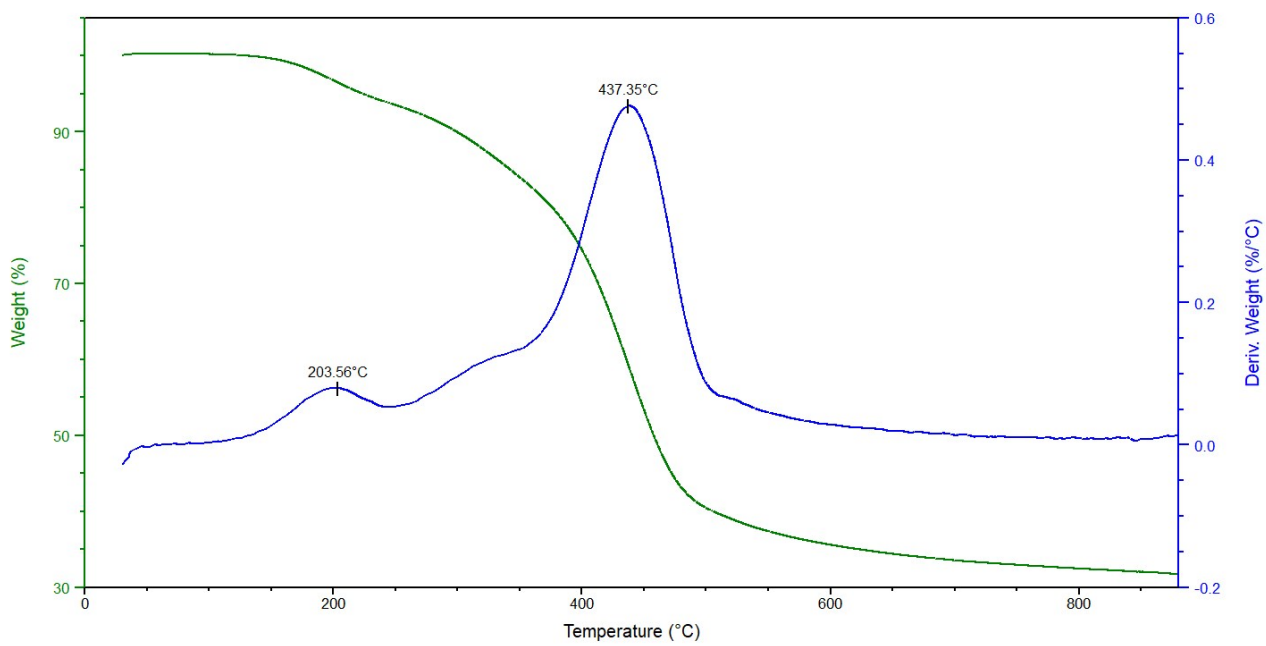

**Figure S10** Thermal gravimetric analysis of IL-functionalized sporopollenin **6b**.

## ATR-FTIR Spectra

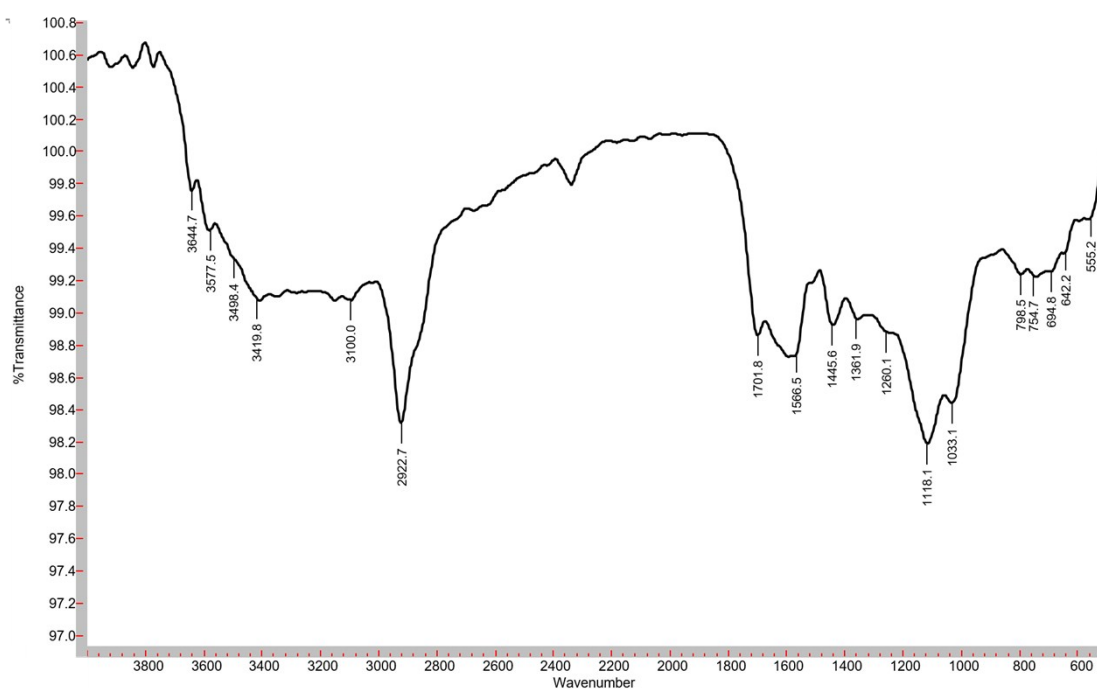

**Figure S11** ATR-FTIR spectrum of IL-functionalized sporopollenin **5a**

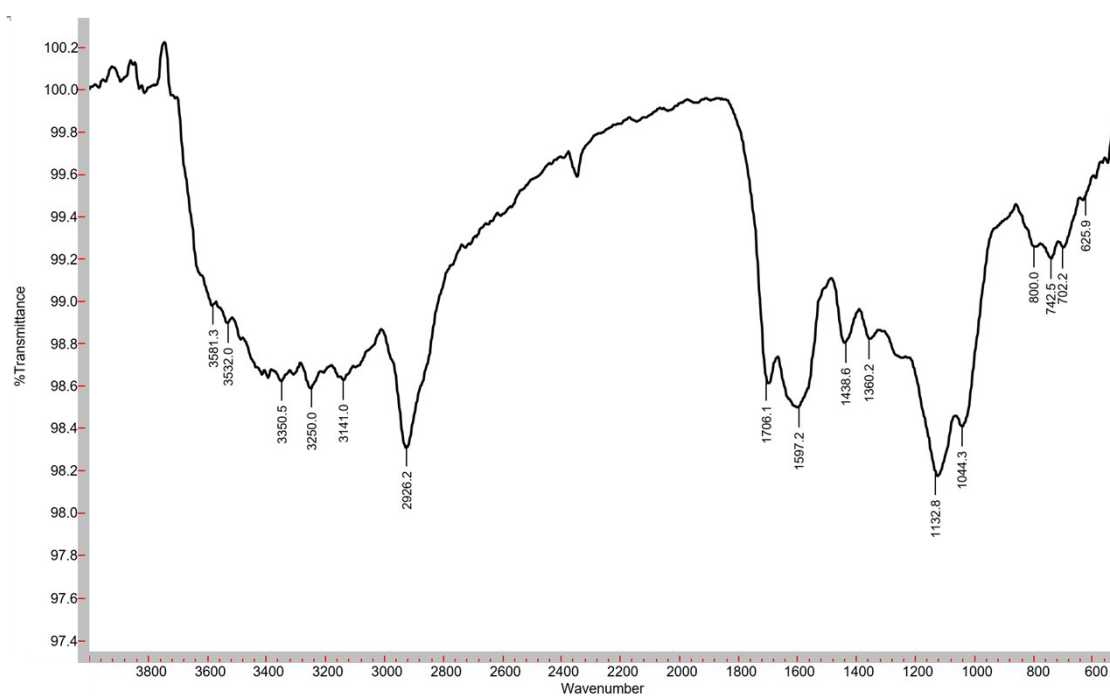

**Figure S12** ATR-FTIR spectrum of IL-functionalized sporopollenin **5b**



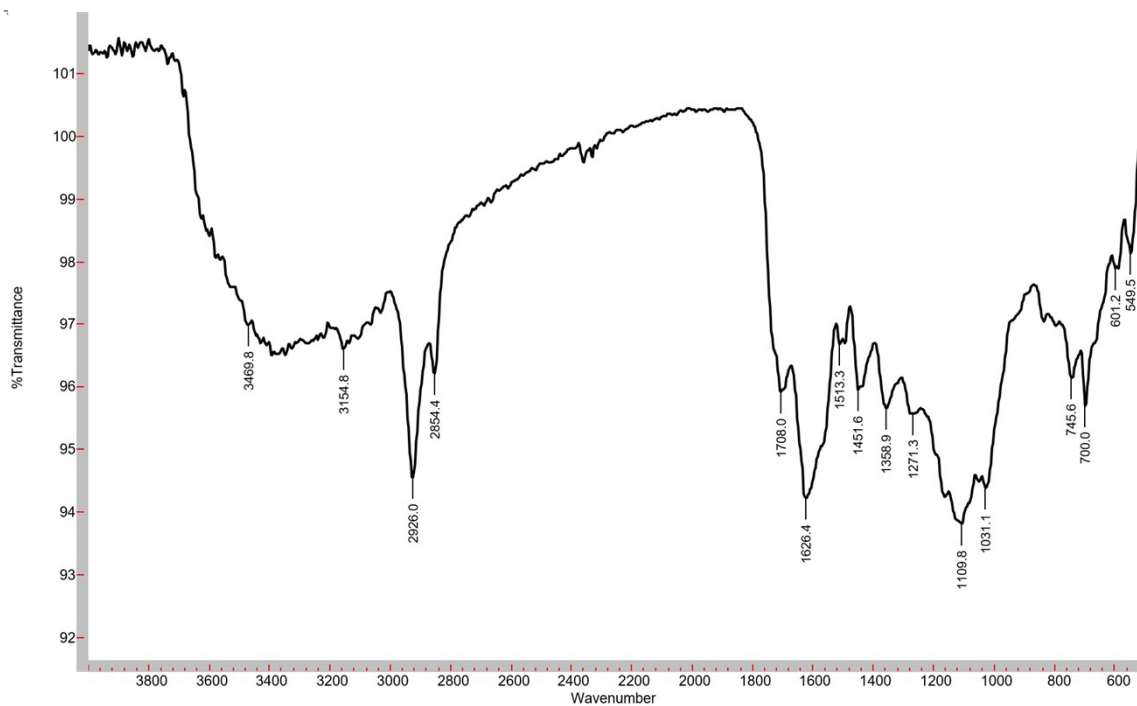

**Figure S13** ATR-FTIR spectrum of IL-functionalized sporopollenin **5d**

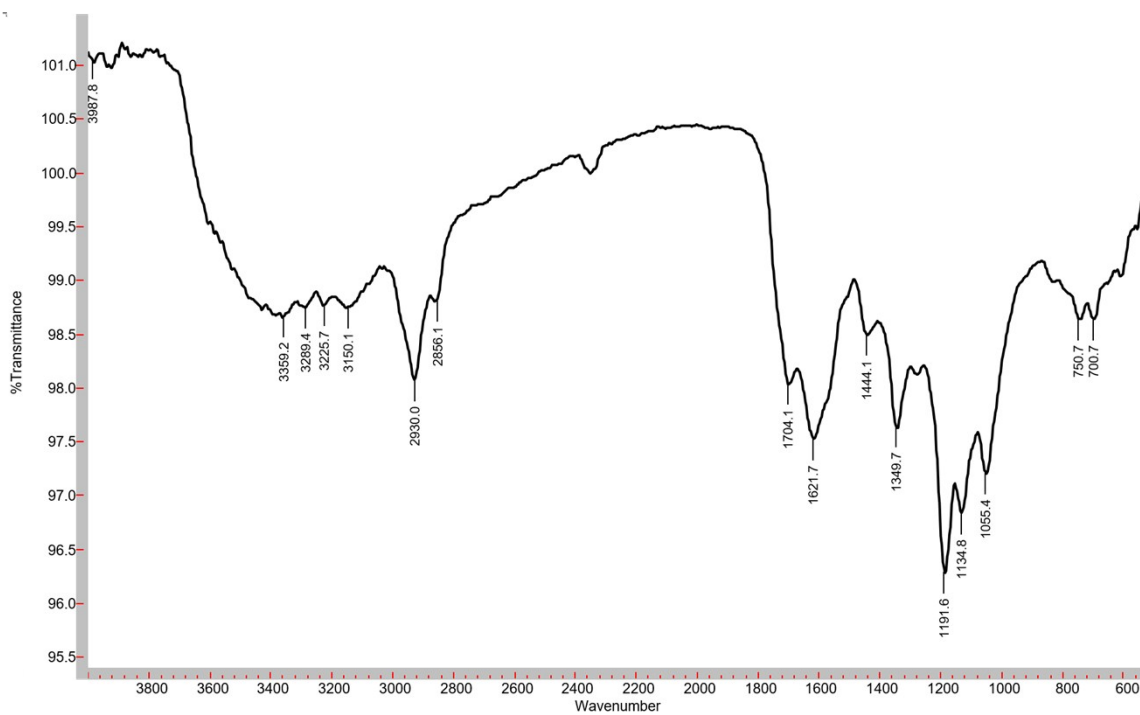

**Figure S14** ATR-FTIR spectrum of IL-functionalized sporopollenin **6d**.

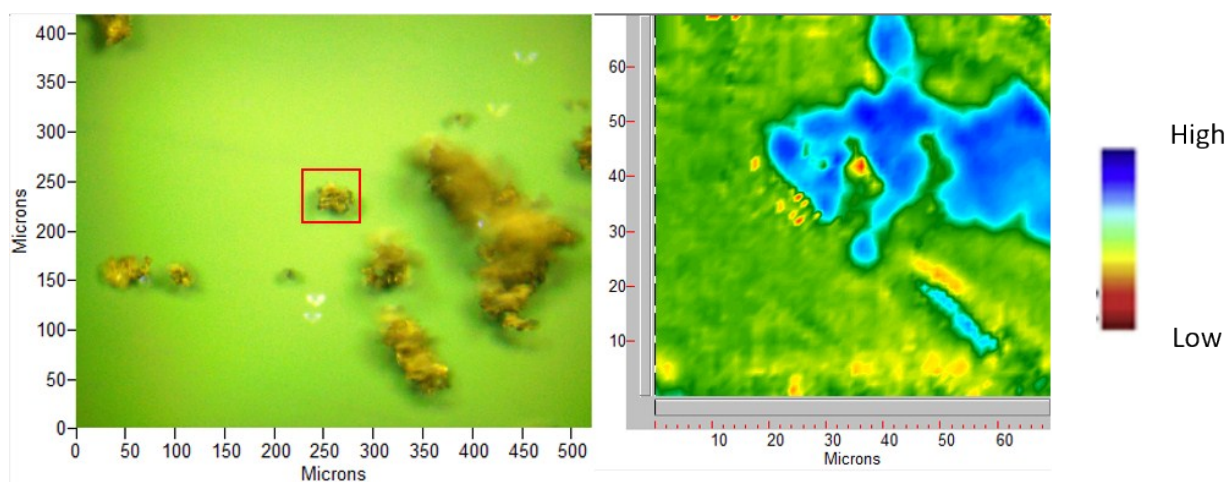

**Figure S15** Visible and FPA images of IL-functionalized sporopollenin **5a** (selected wavenumber:1563  $\text{cm}^{-1}$ )

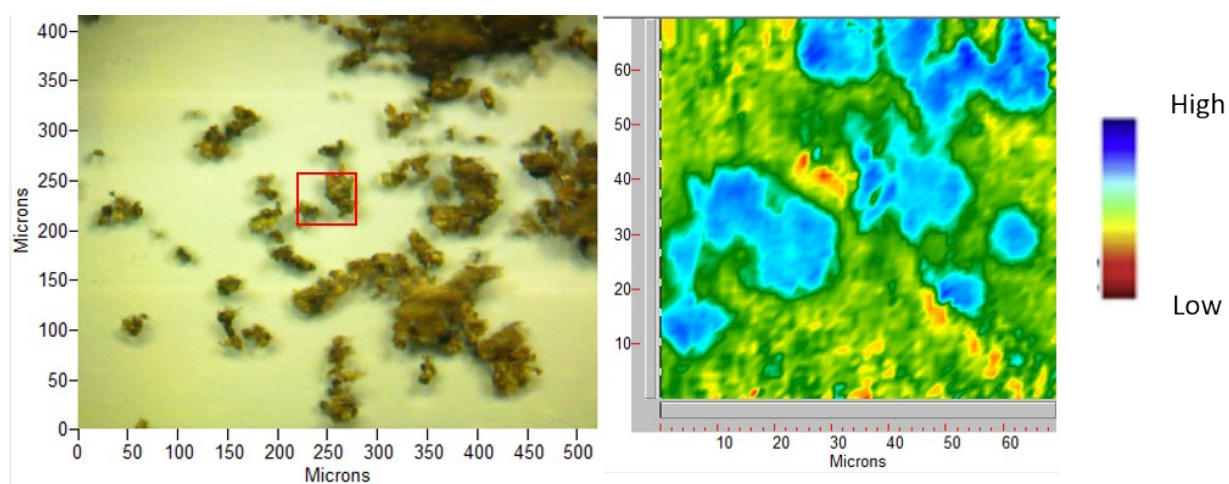

**Figure S16** Visible and FPA images of IL-functionalized sporopollenin **5c** (selected wavenumber:1563  $\text{cm}^{-1}$ )

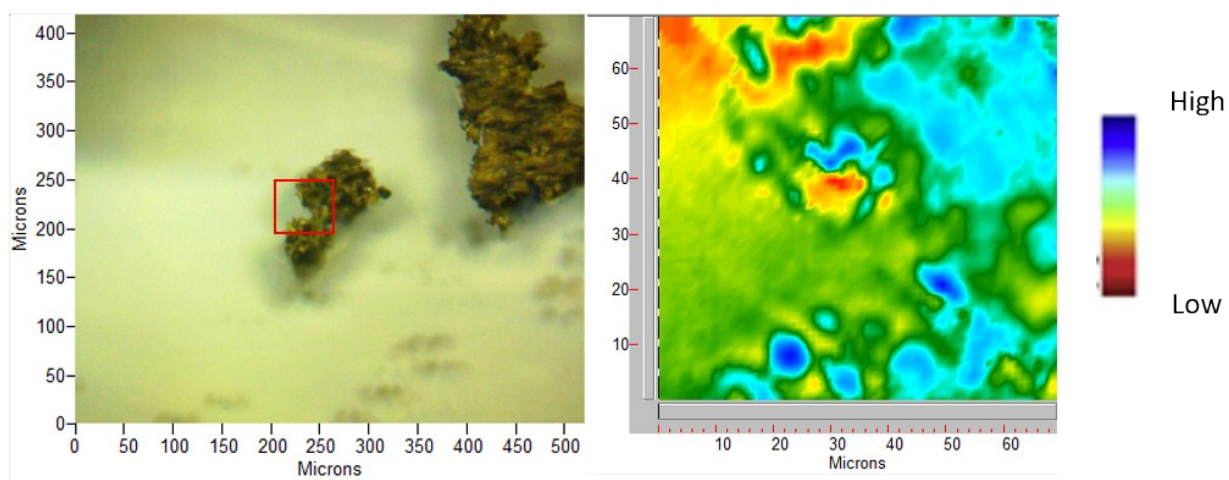

**Figure S17** Visible and FPA images of IL-functionalized sporopollenin **5d** (selected wavenumber:1563  $\text{cm}^{-1}$ )

## Scanning Electron Microscopy (SEM) images

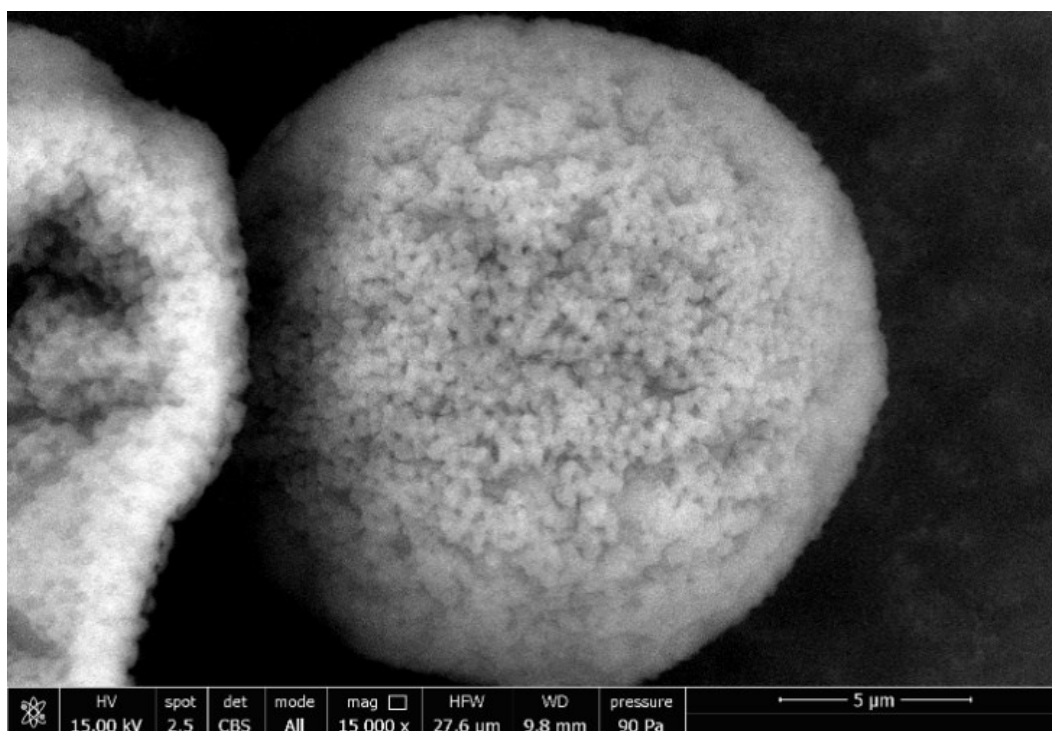

Figure S18 SEM micrograph of *Populus deltoides* pristine pollen

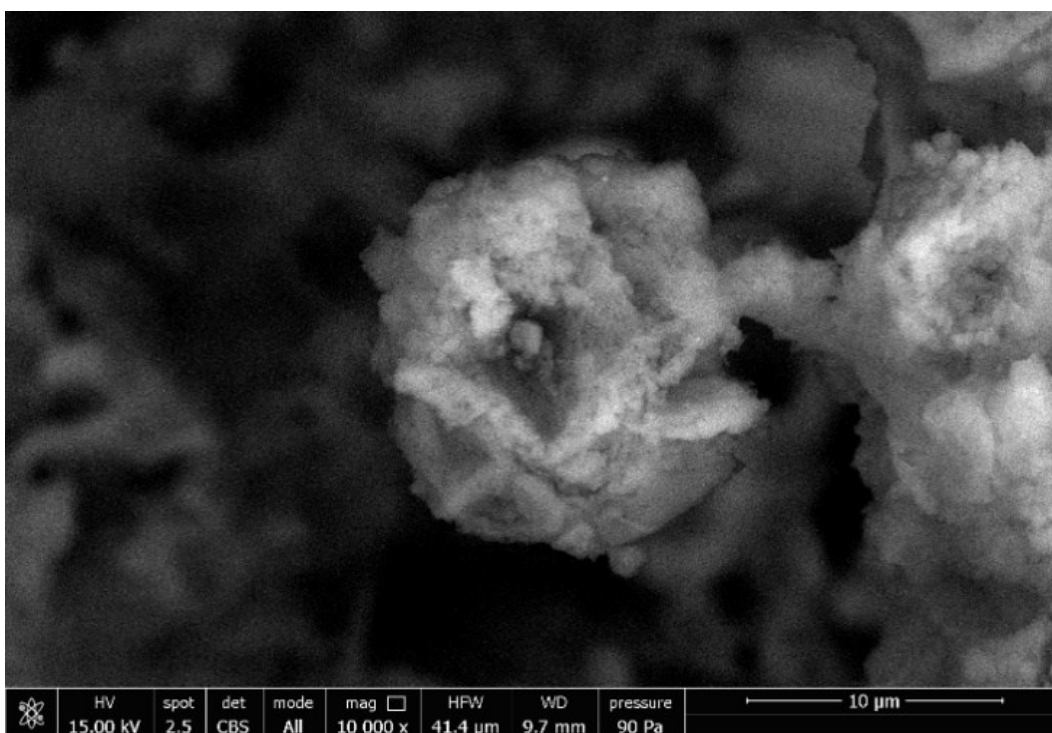

Figure S19 SEM micrograph of sporopollenin extracted with  $[C_4MIMSO_3H]HSO_4$  ionic liquid

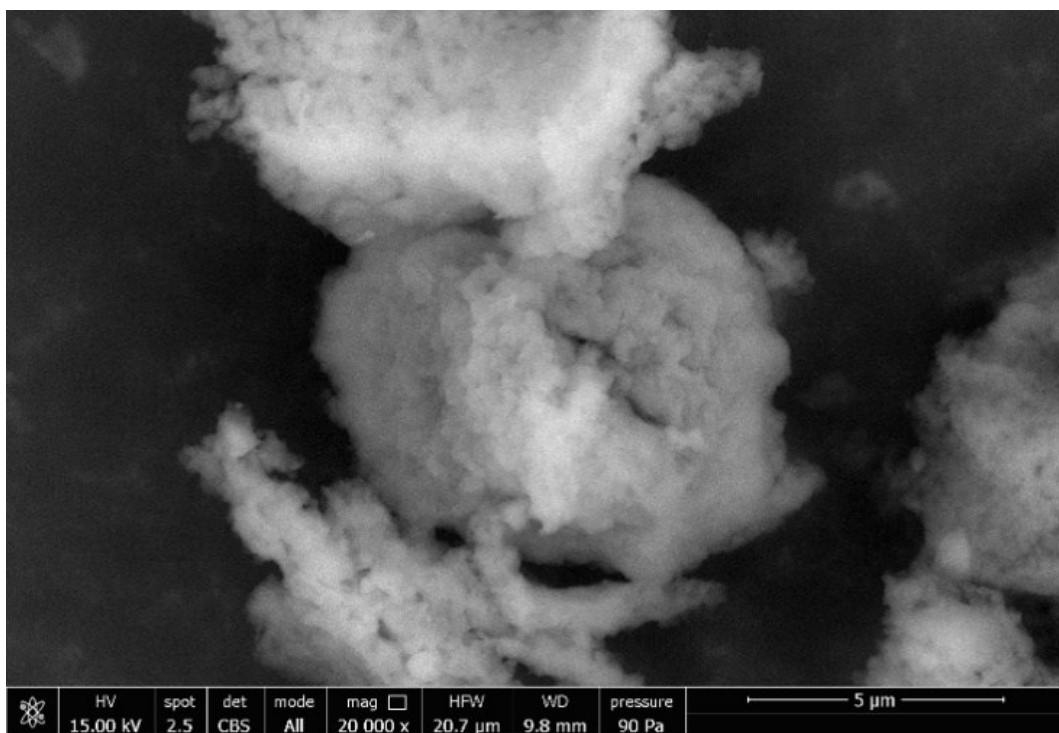

**Figure S20** SEM micrograph of 3-chloropropyl-functionalized sporopollenin **CPS-SEC**

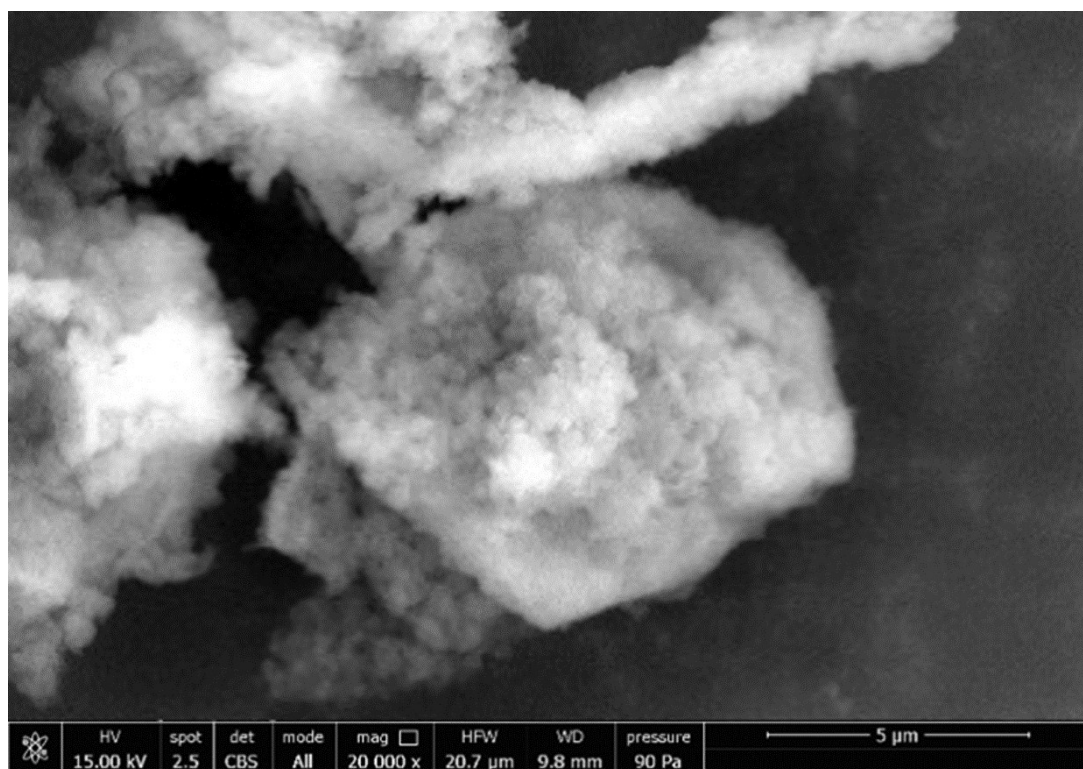

**Figure S21** SEM micrograph of IL-functionalized sporopollenin **5a**

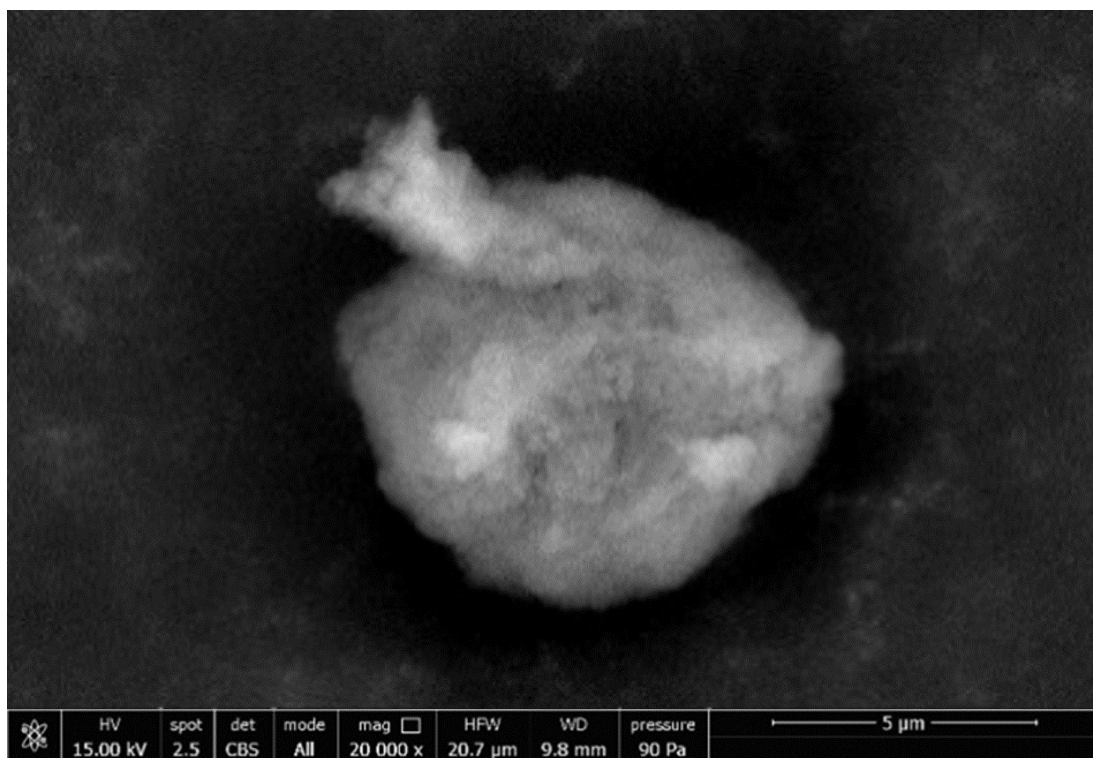

**Figure S22** SEM micrograph of IL-functionalized sporopollenin **5b**

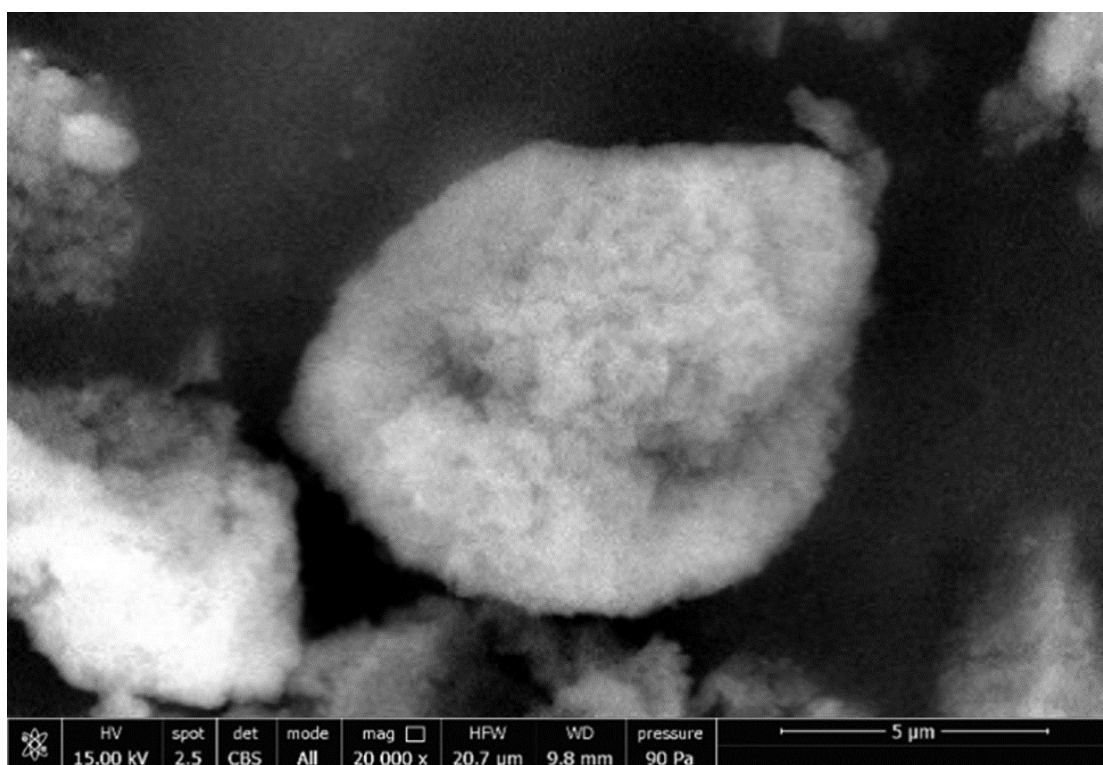

**Figure S23** SEM micrograph of IL-functionalized sporopollenin **5c**

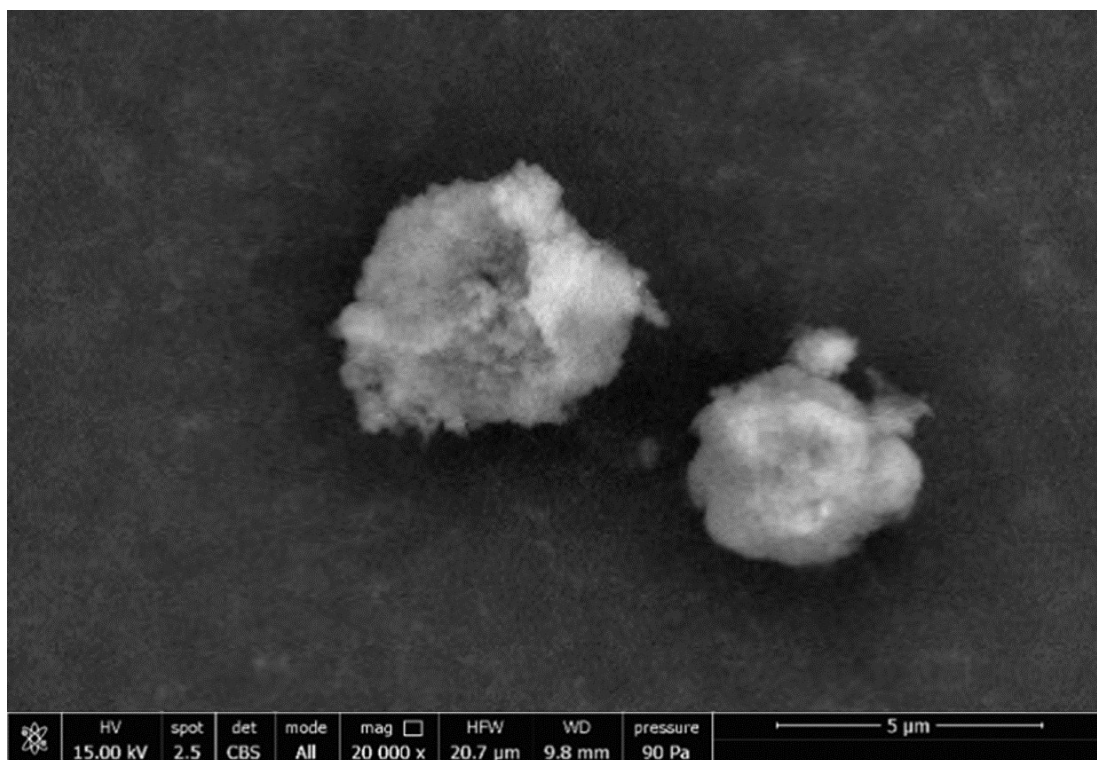

**Figure S24** SEM micrograph of IL-functionalized sporopollenin **5d**
